1 **A new twist on bacterial motility – two distinct type IV pili revealed by cryoEM**

2

3 Alexander Neuhaus<sup>1,2</sup>, Muniyandi Selvaraj<sup>3,7</sup>, Ralf Salzer<sup>4,X</sup>, Julian D. Langer<sup>5,6</sup>, Kerstin Kruse<sup>4</sup>,  
4 Kelly Sanders<sup>1,2</sup>, Bertram Daum<sup>1,2</sup>, Beate Averhoff<sup>4</sup> and Vicki A. M. Gold<sup>1,2,#</sup>,

5

6 <sup>1</sup> Living Systems Institute, University of Exeter, Stocker Road, EX4 4QD, United Kingdom

7 <sup>2</sup> College of Life and Environmental Sciences, Geoffrey Pope, University of Exeter, Stocker  
8 Road, Exeter, EX4 4QD, United Kingdom

9 <sup>3</sup> Department of Structural Biology, Max Planck Institute of Biophysics, Max-von-Laue Str. 3,  
10 60438 Frankfurt am Main, Germany

11 - Current address: Laboratory of Structural Biology, Helsinki Institute of Life Science, 00014  
12 University of Helsinki, Finland

13 <sup>4</sup> Molecular Microbiology and Bioenergetics, Institute of Molecular Biosciences, Goethe  
14 University Frankfurt, Max-von-Laue Str. 9, 60438 Frankfurt am Main, Germany

15 <sup>X</sup> Current address: Structural Studies Division, Medical Research Council – Laboratory of  
16 Molecular Biology, Cambridge Biomedical Campus, Francis Crick Ave, Cambridge CB2 0QH,  
17 United Kingdom

18 <sup>5</sup> Department of Molecular Membrane Biology, Max Planck Institute of Biophysics, Max-von-  
19 Laue Str. 3, 60438 Frankfurt am Main, Germany

20 <sup>6</sup> Proteomics, Max Planck Institute for Brain Research, Max-von-Laue Str. 4, 60438 Frankfurt  
21 am Main, Germany

22

23 #corresponding author

24

25 **Keywords: Type IV pili, electron cryo-tomography, electron cryo-microscopy, helical**  
26 **reconstruction, pilin, flexible filaments**

27 **Summary**

28 Many bacteria express flexible protein filaments on their surface that enable a variety of  
29 important cellular functions. Type IV pili are examples of such filaments and are comprised of  
30 a helical assembly of repeating pilin subunits. Type IV pili are involved in motility (twitching),  
31 surface adhesion, biofilm formation and DNA uptake (natural transformation). They are  
32 therefore powerful structures that enable bacterial proliferation and genetic adaptation,  
33 potentially leading to the development of pathogenicity and antibiotic resistance. They are  
34 also targets for drug development.

35

36 By a complement of experimental approaches, we show that the bacterium *Thermus*  
37 *thermophilus* produces two different forms of type IV pilus. We have determined the  
38 structures of both and built atomic models. The structures answer key unresolved questions  
39 regarding the molecular architecture of type IV pili and identify a new type of pilin. We also  
40 delineate the roles of the two filaments in promoting twitching and natural transformation.

41 **Main**

42 Type IV pili (T4P) are flexible extracellular protein filaments found on many bacteria. They  
43 form multifunctional fibres involved in twitching motility, adhesion, immune evasion,  
44 bacteriophage infection, virulence and colony formation. T4P have also been linked to DNA  
45 uptake, called natural transformation, which is a powerful mechanism that enables genetic  
46 adaptation<sup>1-3</sup>. The filaments are homopolymers composed of thousands of pilin subunits,  
47 which form helical arrays measuring several micrometres in length. How T4P are involved in  
48 seemingly unrelated functions such as motility and natural transformation is so far unclear.

49

50 Depending on the bacterial species, pilins range from 90 to 250 amino acids in length. They  
51 are produced as prepilins with a typical class III signal peptide<sup>4,5</sup>. The preprotein is  
52 translocated via the Sec pathway into the cell membrane where the signal peptide is cleaved  
53 by prepilin peptidase, priming the pilin for incorporation into the growing pilus. Filament  
54 assembly is ATP-dependent and occurs at an inner membrane platform which contains PilC,  
55 PilM, PilN and PilO<sup>6</sup>. In *Thermus thermophilus*, assembly of pilins into a T4P filament depends  
56 on the assembly ATPase PilF, which interacts with the inner membrane platform via PilM<sup>7</sup>.  
57 Two retraction ATPases, PilT1 and PilT2, are essential for T4P depolymerisation<sup>8,9</sup>. T4P are  
58 extruded by the outer membrane secretin PilQ<sup>10-13</sup>. Recently, it has been suggested that  
59 expression of the *T. thermophilus* major pilin PilA4 is temperature dependent, leading to  
60 hyperpiliation at suboptimal growth temperatures<sup>14</sup>. The first two *in situ* structures of T4P  
61 assembly machineries were solved only recently in both open (pilus assembled) and closed  
62 (pilus retracted) states<sup>11,15</sup>, yet detailed information regarding the molecular interactions  
63 governing filament assembly was lacking.

64

65 Crystal structures of full length pilins or head domains from various bacteria are available  
66 in different oligomeric states<sup>6,16-22</sup>. Pilins have a conserved N-terminal  $\alpha$ -helix, with a 4-5  
67 stranded anti-parallel  $\beta$ -sheet at the C-terminus. The  $\alpha$ -helix forms the core of the filament,  
68 while the globular  $\beta$ -sheet head domain is solvent exposed and subject to post-translational  
69 modifications<sup>16,17</sup>. To date, five low-resolution electron cryo-microscopy (cryoEM) structures  
70 of isolated T4P have been reported. The first, a 12.5 Å structure from *Neisseria gonorrhoeae*,  
71 was sufficient to place crystal structures of pilins into the data but not to resolve their  
72 structure within the map<sup>17</sup>. Four subsequent structures from *Pseudomonas aeruginosa*, two  
73 *Neisseria* species and enterohemorrhagic *Escherichia coli* have been determined in the 5-8 Å  
74 resolution range<sup>23-25</sup>.

75

76 In this study, we combine different modes of cryoEM: electron cryo-tomography (cryoET) and  
77 single-particle cryoEM, with functional data to study the T4P of *T. thermophilus*, which is a  
78 well-established model organism. Surprisingly, we detect two forms of T4P, a wider and a  
79 narrower form, assembled through the same machinery. We determine structures of the two  
80 filaments at so-far unprecedented resolution (3.2 Å and 3.5 Å, respectively). This has enabled  
81 us to visualise near atomic-level detail and build atomic models for each filament *ab initio*.  
82 Our data unambiguously demonstrate that the wider pilus is composed of the major pilin  
83 PilA4. Proteomics and knock-out mutants reveal that the narrow pilus consists of a previously  
84 unknown pilin, which we name PilA5. Functional experiments confirm that PilA4 is involved in  
85 natural transformation whereas PilA5 is essential for twitching motility<sup>26</sup>. Our results shed  
86 new light on bacterial motility and gene transfer, and will help to guide the development of  
87 new drugs to fight microbial pathogens.

88

### 89 ***Two types of T4P are assembled from the same machinery***

90 Cells of *T. thermophilus* strain HB27 assemble T4P pili on their surface<sup>27</sup>, predominantly at  
91 the cell poles<sup>11</sup>. Performing cryoET on cells grown at the optimal growth temperature of 68  
92 °C revealed two types of pilus, with differences in their diameter. They emerge from the same  
93 assembly machinery (Fig. 1a, b), suggesting that they are both T4P. We have previously shown  
94 that transcription of the major pilin gene, *pilA4*, is upregulated at low temperature<sup>14</sup>. To  
95 address the question of whether the growth temperature affects the assembly of the two  
96 forms of pilus, we analysed the pili emerging from cells grown at the sub-optimal growth  
97 temperature of 58 °C by cryoET. Again, two types of pilus were observed (Fig. 1c, d). Pili  
98 emerge from T4P complexes only sporadically<sup>11</sup>, thus filaments were isolated from cells in  
99 order to investigate their structure in more detail. Both wide and narrow forms of the filament  
100 were detected in these preparations (Fig. S1a-d).

101

102 To investigate the composition of the two pilus forms, we performed a quantitative  
103 bottom-up proteomics analysis. Protein abundance was evaluated by Label-Free Quantitation  
104 (LFQ) to determine relative enrichment or loss of particular pilus proteins at either 68 °C or 58  
105 °C. At both temperatures, the major pilin subunit PilA4 was identified as the most abundant  
106 protein component (Fig. S2a). The amount of PilA4 increased significantly at 58 °C, in line with  
107 the hyperpiliation phenotype<sup>14</sup>. The second most abundant protein was the uncharacterised  
108 protein TT\_C1836; the relative abundance was also significantly increased at 58 °C.

109

110 To refine the identification of pilins, we performed gel based proteomic analysis (Fig. S2b,  
111 Table S1). In order to increase the hyperpiliation phenotype, we further reduced the growth  
112 temperature to 55 °C. At this temperature we could identify PilA4 and TT\_C1836 as the most  
113 abundant proteins in the lower molecular weight bands, likely representing the pilin  
114 monomers. In contrast, at the optimal growth temperature of 68 °C, only PilA4 was identified  
115 reliably. We questioned whether the two T4P were expressed due to differences in  
116 temperature or growth phase. To quantify the abundance of different filaments, cells were  
117 grown under different conditions and analysed in the electron microscope. Pili at both cell  
118 poles were selected for 2D classification, which enables grouping of similar structures (Fig.  
119 S3a). For cells grown on plates, both wide and narrow pili were present at a similar level,  
120 whereas the ratio of the two was shifted towards the wider form for cells grown in liquid  
121 medium. At 55 °C, only the total number of pili per cell increased, while the ratio between  
122 wide and narrow pili was similar between the two temperatures (Fig. S3b).

123

124 To analyse the role of PilA4 and TT\_C1836 in pilus assembly, we investigated the number of  
125 wide and narrow pili per cell in deletion strains grown in liquid media to exponential phase  
126 (Fig. S3c). PilA4 deficient cells (*pilA4::km*) were not able to assemble any pili reliably, whereas  
127 TT\_C1836 deficient cells (*TT\_C1836::km*) were only defective in their ability to assemble  
128 narrow pili. These findings suggest that PilA4 has a role in producing both pilus forms, while  
129 TT\_C1836 appears to be crucial for the formation of narrow pili only. However, these data do  
130 not allow us to discriminate whether the proteins have structural roles in comprising the  
131 filaments, or have a more functional role in their assembly mechanism.

132

### 133 ***High-resolution maps determine the 3D structure of both filaments***

134 In order to investigate the architecture and protein composition of T4P at high resolution,  
135 both filaments were subjected to analysis by single particle cryoEM and helical reconstruction.  
136 In our micrographs, the wide pili appeared very straight while the narrow pili showed a much  
137 higher degree of curvature, up to 2 µm radius (arrowhead in Fig. S4A, B). Based on 2D classes  
138 (Fig. S4c, d) we determined the helical parameters for the wide and the narrow pilus (Fig. S5a–  
139 d, see methods section for details). The rise and twist of the wide pilus measured 9.33 Å and  
140 92.5° respectively, and the narrow pilus had a rise of 11.30 Å and a twist of 84.3°. Helical  
141 reconstruction<sup>28</sup> resulted in maps at 3.22 Å (wide) and 3.49 Å (narrow) (Fig. 2a, b, S5e, f). The  
142 diameter of the wide fibre is 70 Å (Fig. 2a) and is roughly cylindrical. In contrast, the narrow  
143 filament has a zigzag-like appearance in projection, owing to a 15 Å-wide groove that winds  
144 through the fibre. The diameter at any position along the long axis of the fibre axis is therefore  
145 only 45 Å (Fig. 2b). Both structures were in good agreement with the data obtained *in situ* by

146 cryoET (Fig. 1). A low-resolution structure of the T4P from *T. thermophilus* was previously  
147 determined by cryoET and sub-tomogram averaging, with a diameter of  $\sim 3.5$  nm<sup>11</sup>. It seems  
148 likely that this conformation represents the narrower form of the pilus.

149

150 Both maps clearly resolved individual pilin monomers. The peptide backbone could be easily  
151 traced throughout each subunit and large side chains were visible (Fig. 2c, d). The centre of  
152 each filament is formed by a bundle of long N-terminal  $\alpha$ -helices, as has been demonstrated  
153 for other filaments<sup>17,23–25,29</sup>. In both maps, each  $\alpha$ -helix is interrupted by an unfolded stretch  
154 (brackets in Fig. 2c, d), a conserved feature observed in the N-terminal domains of all available  
155 T4P structures. Interestingly, the unfolded region is significantly longer for the pilin comprising  
156 the narrow filament, resulting in a longer N-terminal stalk. The outer regions of both filaments  
157 are formed by globular domains consisting of  $\beta$ -strands, a typical hallmark of the T4P C-  
158 terminal domain<sup>30</sup>. Whilst the C-terminal head domains of both pili are comprised of central  
159  $\beta$ -sheets, the domain size and the region linking to the N-terminal  $\alpha$ -helix appear different.  
160 These findings suggest that the two pili are not only distinct with regards to their helical  
161 parameters, but also consist of different proteins.

162

163 As shown, we observe both filaments emerging from the T4P machinery (Fig. 1). This is  
164 supported by previous studies showing that mutants defective in the PilQ secretin channel do  
165 not extrude pili<sup>27</sup>. In addition, previous studies have shown that a mutant defective in the  
166 assembly ATPase PilF is non-piliated<sup>9</sup>. This suggests that both pili are extruded by the same  
167 assembly machinery. The aperture within the central channel of PilQ is of sufficient dimension  
168 to accommodate either form (Fig. 2e, f).

169

### 170 ***Atomic models of T4P***

171 The resolution and quality of both maps allowed us to unambiguously build an atomic model  
172 for each filament *ab initio* (Fig. 3a - f). Guided by our mass spectrometry results, the position  
173 of large side chains and clear differences in the length of the polypeptide backbones, we were  
174 able to identify PilA4 as the building block for the wide pilus and the previously  
175 uncharacterised protein TT\_C1836 as the subunit for the narrow filament. We now propose  
176 that TT\_C1836 be named PilA5, in keeping with *Thermus* nomenclature.

177

178 The N-terminal  $\alpha$ -helix, including the unfolded stretch, is comprised of the first 54 (PilA4) or  
179 53 amino acids (PilA5). In both proteins the helix is disrupted by an unfolded stretch around  
180 the conserved Pro22 (Fig. 3c, d, S6). The stretch in PilA4 is 4 amino acids long as opposed to  
181 10 amino acids long in PilA5. The region between the N-terminal  $\alpha$ -helix and the C-terminal

182  $\beta$ -sheet, the so-called glycosylation loop, ranges in PilA4 from amino acids 55 to 77, with a  
183 two-turn  $\alpha$ -helix comprising amino acids 61-67. The C-terminal region is an antiparallel four-  
184 stranded  $\beta$ -sheet with the last strand facing towards the N-terminus followed by a loop that  
185 ends on the  $\beta$ -sheet. A disulphide bond between Cys89, which is located in the second strand,  
186 and the penultimate amino acid Cys124, likely stabilises the C-terminus (Fig. 3e). The  
187 glycosylation loop in PilA5 spans amino acids 54 to 71, with amino acids 62 to 65 forming a  
188 one-turn helix. The C-terminal  $\beta$ -sheet is composed of five strands, one more than observed  
189 in PilA4. Due to the additional  $\beta$ -strand in PilA5, the last strand faces away from the N-  
190 terminus of the protein. The C-terminus of PilA5 is located between the  $\beta$ -sheet, the  
191 glycosylation loop and the long  $\alpha$ -helix. A disulphide bond is formed between Cys60 in the  
192 glycosylation loop and Cys88 in the third  $\beta$ -strand (Fig. 3f). Both pilins are highly hydrophobic  
193 at the N-terminal part of the  $\alpha$ -helix, and more hydrophilic on the surface of the globular  
194 domain (Fig. 3g & h). The hydrophobic helices bundle and form the hydrophobic core of the  
195 assembled filament. PilA4 has no net charge but the filament displays a distinctive positively  
196 charged groove along the filament axis (Fig. 3i). In contrast, PilA5 has a total of 2 negative  
197 charges per subunit which leads to a patch of negative charge winding around the filament  
198 (Fig. 3j).

199

200 A network of cooperative interactions between pilin subunits holds the fibres together. Each  
201 subunit has 6 (wide form) or 7 (narrow form) physical interaction partners in each direction  
202 of the fibre (thus 12 or 14 total interaction partners) spread in side-by-side or top-to-bottom  
203 directions (Fig. S7a, b). Most of the interactions involve a large portion of the N-terminal  $\alpha$ -  
204 helices within the hydrophobic core as well as the head domains. In the wide (PilA4) filament,  
205 each subunit (subunit A) interacts with the N-termini that project down from the next two  
206 subunits (B and C) above and from the subunits which are six and seven subunits above (G  
207 and H). A second interaction takes place between the upper part of the  $\alpha$ -helix in subunit A  
208 and the glycosylation loop in subunit B (Fig. S7a). In the narrow (PilA5) filaments, subunit A  
209 interacts via its  $\alpha$ -helix with the N-termini of subunits B, C, F, G and H, while there is an  
210 additional interaction between the upper part of the  $\alpha$ -helix in subunit A with the  
211 glycosylation loop in subunit B (Fig. S7b).

212

213 For both types of pili, the largest interaction interface is between subunits which are 3 or 4  
214 subunits apart (subunit A with subunit D and E). Thus each pilin subunit has a large interaction  
215 interface with 6 other subunits (B, D and E in Fig. S7a, b) and 6 or 8 smaller interaction sites  
216 (C, G, H in Fig. S7a and C, G, H, F in Fig. S7b). Most interactions involve the hydrophobic  
217 sidechains in the centre of the filament and appear to be nonspecific, likely allowing sliding

218 movements between the subunits when the filaments are stretched. This is in accordance  
219 with the observation that pili can stretch up to threefold upon force <sup>31</sup>. In addition, Pila4  
220 contains salt bridges between Asp53 in subunit A and Arg30 in subunit D, and between Glu48  
221 in subunit A and Arg28 in subunit E. In contrast, Pila5 contains a single salt bridge between  
222 Glu68 in subunit A and Arg23 in subunit D (Fig. S7c). The conserved Glu5 is likely required to  
223 neutralise the positive charge of the N-terminus within the hydrophobic core of the filament  
224 <sup>4,32,33</sup>. A salt bridge is also found between Glu5 and the N-terminus of the neighbouring subunit  
225 in other T4P <sup>23,24</sup>. For both *T. thermophilus* fibres the distance between Glu5 and adjacent N-  
226 termini is too far to form a salt bridge. Instead, Glu5 forms an intramolecular salt bridge to  
227 the N-terminus in the same subunit (Fig. S7c). This was also modelled for the related *Klebsiella*  
228 *oxytoca* pseudopilus <sup>34</sup>.

229

### 230 **Posttranslational modification**

231 Densities were observed in both EM maps that protrude into the solvent and cannot be  
232 attributed to the polypeptide backbone and were too large to account for an amino acid side  
233 chain (Fig. 4). Interestingly, these densities co-localised with serine residues and were similar  
234 in appearance to previously published densities attributed to glycosylation sites <sup>29,35,36</sup>. We  
235 suggest that these densities correspond to O-linked glycosylation, which is consistent with the  
236 previous finding that the major pilin Pila4 of *T. thermophilus* is glycosylated <sup>37</sup>. Glycosylation  
237 has also been observed in similar locations in the X-ray structure of *N. gonorrhoeae* type IV  
238 pilin head domain (PDB: 2HI2) <sup>16,17,38</sup>. In Pila4, we found extra densities at 3 serine residues in  
239 the glycosylation loop (Ser59, Ser66 and Ser71), while only one serine appeared to be  
240 modified in Pila5 (Ser73). Interestingly the density was much more pronounced in Pila5 than  
241 in Pila4. This may be due to a less flexible glycan moiety in Pila5, allowing for improved  
242 resolution, or by a different composition of the sugar residues entirely. Glycosylation may  
243 enhance temperature stability via additional hydrogen bonds, increase adhesive properties  
244 (either to surfaces or to small molecules such as DNA) or act as recognition tags for cell-cell  
245 communication <sup>39</sup>.

246

### 247 **The functional importance of two types of pili**

248 A key outstanding question pertains to the functional relevance of the two types of T4P.  
249 To investigate this question, we performed various functional analyses on Pila4 and Pila5  
250 deletion strains. We assessed cell lines without pili (*pila4::km*), with wide pili only (*pila5::km*),  
251 or a mixed population of wide and narrow pili (wild type).

252



253 We analysed cellular motility by twitching assays at 68 °C and 55 °C. Wild-type cells formed  
254 characteristic twitching zones of ~2 cm and ~1.2 cm in diameter, respectively. The mutants  
255 *pilA4::km* and *pilA5::km* did not exhibit any twitching motility (Fig. 5a). Since the immotile  
256 *pilA5::km* cells could still produce wide pili comprised of PilA4, we deduce that PilA5 is  
257 required to promote cell movement. Cells lacking both types of pili in the *pilA4::km* mutant  
258 were completely defective in natural transformation, in agreement with our former finding<sup>40</sup>.  
259 Transformation efficiency was only partially reduced in the *pilA5::km* mutant (~30%), which  
260 expresses wide PilA4 pili (Fig. 5b). This corresponds to our previous finding that a *pilA5::km*  
261 mutant is still transformable<sup>40</sup> and demonstrate that the narrow pili are dispensable for DNA  
262 uptake.

263

264 In summary, we conclude that PilA4 has three known roles: it promotes pilus formation for  
265 both wide and narrow filaments, it comprises the main structural element of the wide T4P,  
266 and it plays a role in natural transformation. We determine two functions for PilA5: it forms  
267 the basis of the narrow T4P and is a requirement for cell motility.

268

269

## 270 Discussion

271 We have determined the first cryoEM structures of T4P that have allowed atomic models to  
272 be built *ab initio*. Moreover, we have discovered two distinct T4P filaments, which are  
273 composed of different proteins. Our data provide compelling evidence that PilA5 is essential  
274 for twitching motility and confirm the previous finding that PilA4 is involved in natural  
275 transformation<sup>40</sup>. In addition, we find that PilA4 is essential for the assembly of both wide and  
276 narrow pili. PilA4 may therefore play a crucial regulatory role, could initiate pilus formation,  
277 or even form a capping structure. In many bacteria, minor pilins are thought to prime pilus  
278 assembly by reducing the energy barrier to the extraction of pilins from the membrane<sup>41</sup>. In  
279 *Thermus*, PilA4 may perform this role.

280

281 The unique functionality of PilA4 and PilA5 is hardcoded in their distinct structural features.  
282 Both filaments follow the conserved T4P blueprint, encompassing a central bundle of  
283 hydrophobic N-terminal  $\alpha$ -helices and a hydrophilic C-terminal  $\beta$ -strand globular domain<sup>39</sup>.  
284 Structural variations in PilA4 and PilA5 determine distinct inter-subunit interactions, helical  
285 parameters, mechanical properties, adhesiveness and binding affinity. Narrow pili comprised  
286 of PilA5 are more flexible than those comprised of PilA4. In line with their predicted role in  
287 twitching, narrow pili that can bend and flex would enable the filaments to curve from the  
288 surface of cells to interact with surfaces, negotiate obstacles and increase the exploratory

289 range of the cell. Their overall net negative surface charge would enhance the adhesive  
290 properties of the fibre and facilitate surface adhesion.

291

292 In accordance with the role of PilA4 in natural transformation, the surface of wide PilA4  
293 filaments show a striking line of positively-charged residues along the long axis. We speculate  
294 that these may be involved in binding the negatively charged DNA backbone. A double  
295 stranded DNA molecule fits into a right-handed helical groove flanked by glycan residues. This  
296 would allow interaction of the DNA backbone phosphates with positive charges in the PilA4  
297 filament at regular intervals. Flanking glycans and negative charges may coordinate proper  
298 DNA binding (Fig. 6). This suggestion is in good agreement with the well characterised roles of  
299 T4P in DNA binding and uptake in *Neisseria*, and of DNA binding in *P. aeruginosa*<sup>42,43</sup>. Our  
300 proposal is also consistent with that of Craig *et al*, who suggest that the positively charged  
301 groove of gonococcal T4P is wide enough to bind the negatively charged backbone of dsDNA  
302<sup>17</sup>. Interestingly, previous experiments have shown that pili are not solely important for  
303 natural transformation. For example, a mutant defective in the PilF assembly ATPase was  
304 impaired in piliation and was hypertransformable, and a mutant carrying a deletion in a  
305 domain of the secretin PilQ was impaired in piliation but exhibited wildtype transformation  
306 frequencies<sup>10,44</sup>. Taken together, we suggest that wide pili comprised of PilA4 may capture  
307 DNA rather like a fishing net, thus improving the efficiency of DNA uptake by increasing the  
308 local concentration of DNA near the outer membrane.

309

310 In evolutionary terms, bacteria appear to have reused the T4P blueprint to develop a system  
311 that can assemble two different filaments with unique properties. This could enable tasks to  
312 be performed more effectively and at reduced energy cost to the cell. It will now be interesting  
313 to discover if this principle occurs in other bacterial species, and excitingly, will open avenues  
314 to the development of vaccines or therapeutics targeting a particular T4P mechanism.

315

316

## 317 **Experimental procedures**

### 318 **Cultivation of organisms**

319 *T. thermophilus* HB27 was grown in TM<sup>+</sup> medium (8 g/l tryptone, 4 g/l yeast extract, 3 g/l NaCl,  
320 0.6 mM MgCl<sub>2</sub>, 0.17 mM CaCl<sub>2</sub>)<sup>45</sup> at 55 °C, 58 °C or 68 °C. Antibiotics were added when  
321 appropriate (kanamycin, 80 mg/ml; streptomycin, 100 mg/ml in solid medium (containing 2  
322 % agar [w/vol]) or kanamycin, 60 mg/ml; streptomycin 100 mg/ml in liquid medium).  
323 Disruption of *TT\_C1836* and *pilA4* was performed by insertion of a kanamycin marker<sup>27</sup>.

324

### 325 **Purification of pili**

326 *T. thermophilus* HB27 cells were grown for two days on TM<sup>+</sup> medium at 68 °C or three days at  
327 55 °C. Cells were scraped off and resuspended by pipetting and shaking in ethanolamine  
328 buffer (0.15 M ethanolamine, pH 10.5). Cells were sedimented by centrifugation (16.200 x g,  
329 1 h, 4 °C). The supernatant was gently mixed with saturated ammonium sulfate solution [10/1  
330 (v/v)] and incubated on ice for 12 h. Pili were precipitated by centrifugation for 10 min (16,200  
331 x g, 4 °C). The resulting pellet was washed twice with TBS buffer (50 mM Tris/HCl, 150 mM  
332 NaCl, pH 7.5). The pellet was resuspended by incubation in distilled water for 4 h. 10x buffer  
333 (500 mM Tris/HCl, 500 mM NaCl, 10 mM CaCl<sub>2</sub>, 10 mM MgCl<sub>2</sub>, pH 7.5) was added prior to  
334 structural analyses.

335

### 336 **CryoET sample preparation and imaging**

337 Cubes of agar with growing *T. thermophilus* HB27 cells were cut out, placed into EDTA buffer  
338 (20 mM Tris/HCl, 100 mM EDTA, pH 7.4) and gently agitated for 1 hour at room temperature.  
339 Samples were mixed 1:1 with 10 nm protein A-gold (Aurion, Wageningen, The Netherlands)  
340 as fiducial markers and glow-discharged R2/2 Cu 300 mesh holey carbon-coated support grids  
341 (Quantifoil, Jena, Germany) were dipped into the solution. For analysis of isolated pili by  
342 cryoET, preparations were mixed 1:1 with 10 nm protein A-gold fiducial markers and solutions  
343 were gently pipetted onto the grids. All grids were blotted using Whatman 41 filter paper for  
344 ~4 s in a humidified atmosphere and plunge-frozen in liquid ethane in a home-built device or  
345 using a Vitrobot Mark IV (Thermo Fisher, Waltham, USA). Grids were maintained under liquid  
346 nitrogen and transferred into the electron microscope at liquid nitrogen temperature.

347

348 Tomograms were typically collected from +60° to -60° at tilt steps of 2° and 5 - 7 μm  
349 underfocus (whole cells), or at 3 μm underfocus (isolated pili), using either a Tecnai Polara,  
350 Titan Krios (Thermo Fisher) or JEM-3200FSC (JEOL, Tokyo, Japan) microscope, all equipped  
351 with field emission guns operating at 300 keV. All instruments were fitted with energy filters  
352 and K2 Summit direct electron detector cameras (Gatan, Pleasanton, USA). Dose-fractionated  
353 data (3-5 frames per projection image) were collected using Digital Micrograph (Gatan).  
354 Magnifications varied depending on microscope; pixel sizes were within the range 3.8 – 4.2 Å.  
355 The total dose per tomogram was < ~140e<sup>-</sup>/Å<sup>2</sup>. Tomograms were aligned using gold fiducial  
356 markers and volumes reconstructed by weighted back-projection using the IMOD software  
357 (Boulder Laboratory, Boulder, USA) <sup>46</sup>. Contrast was enhanced by non-linear anisotropic  
358 diffusion (NAD) filtering in IMOD <sup>47</sup>.

359

### 360 **Calculations of pilus diameter**

361 Slices through tomograms were analysed by drawing a plot profile of grey values in ImageJ<sup>48</sup>,  
362 which could be exported as a function of distance. Statistical analysis of pilus diameters was  
363 conducted with a sample size of 8 tomograms containing ~60 isolated pili.

364

#### 365 **Negative-stain electron microscopy**

366 Two microliters of purified pili were pipetted onto glow-discharged carbon-coated Cu 400  
367 mesh support grids (Sigma-Aldrich) for 2 minutes. Grids were blotted with Whatman No 41  
368 filter paper and stained with 5 % ammonium molybdate for 60 s. Images were recorded with  
369 a Tecnai Spirit microscope (Thermo Fisher) operated at 120 keV and a OneView CMOS camera  
370 (Gatan). Images were analysed for fibre quality, size, sample density and homogeneity using  
371 EMAN2<sup>49</sup>. For whole cell samples of *T. thermophilus*, either liquid culture was used directly or  
372 some cells were carefully scraped off the plates and resuspended in TBS. If required, cells were  
373 diluted in TBS. Negative staining was performed as described above. For the quantitative  
374 analysis of number and type of pili per cell, filaments from each cell pole were counted and  
375 helices of equal length were selected using e2heliboxer (EMAN2) and subsequently classified  
376 in 2D using RELION<sup>50</sup>. The percentage of wide, narrow and unassigned pili was calculated  
377 based on the number of particles in each class.

378

#### 379 **CryoEM sample preparation and imaging of fibres**

380 Three microliters of isolated pilus suspension were pipetted onto a glow-discharged R2/2 Cu  
381 300 mesh holey carbon-coated grids (Quantifoil). Grids were plunge frozen in liquid ethane  
382 after blotting using a Vitrobot Mark IV (Thermo Fisher) and stored in liquid nitrogen. Cryo  
383 images were collected with a Titan Krios microscope (Thermo Fisher) at the UK national  
384 electron bio-imaging centre (eBIC), equipped with a field emission gun operating at 300 keV .  
385 The microscope was fitted with K2 Summit direct electron detector and Quantum energy filter  
386 (both Gatan, Pleasanton, USA). Dose-fractionated data were collected at 1.5 – 4  $\mu\text{m}$  defocus  
387 using EPU (Thermo Fisher). 3138 micrographs containing both forms of pili were collected as  
388 40-frame movies, corresponding to 8 seconds at a frame rate of 1 frame for every 0.2 seconds.  
389 The total dose was 48 electrons/ $\text{\AA}^2$  at a magnification of 130,000 x, corresponding to a pixel  
390 size of 1.048  $\text{\AA}$ .

391

#### 392 **Image processing, symmetry determination and helical reconstruction**

393 Drift correction was performed using UNBLUR<sup>51</sup>. Straight sections of thin and wide fibres were  
394 boxed separately from the drift corrected images using the heliboxer function of EMAN2,  
395 such that the filaments were centred in each rectangular box. Helical reconstruction was  
396 performed using the boxed filaments and SPRING as follows<sup>52</sup>. Contrast transfer function

397 (CTF) correction was performed using CTFFIND<sup>53</sup>. In order to determine the helical  
398 parameters of the wide filaments a subset of the boxed filaments were cut into small  
399 segments of 373 Å (a multiple of the helical rise) with an 80 % overlap, yielding a total of 9576  
400 segments, which were classed in 2D (Fig. S4a). Close examination of the segments indicated a  
401 filament diameter of 75 Å. The calculated power spectrum from the total segments indicated  
402 clear layer lines that could be indexed. A meridional reflection at approximately 9 Å and a  
403 layer line of order 1 at approximately 36 Å indicated that there are approximately 4 subunits  
404 per turn. The ninth layer was found to be of order 1, suggesting that the helix repeats exactly  
405 after nine turns, with a non-integer number of subunits per turn. The  
406 SEGMENTCLASSRECONSTRUCT module in SPRING on class averages was used to determine  
407 the accurate helical symmetry (Fig. S5a). The suggested output was determined to be either  
408 4.10 or 3.89 subunits in a helical pitch of 36.3 Å. In order to determine the helical parameters  
409 for the narrow filaments a subset of the boxed filaments were cut into segments of 800 Å with  
410 a step size of 330 Å and classed in 2D (Fig. S4b). The helical pitch could be determined directly  
411 as 48.1 Å. A meridional reflection and thus a helical rise at 11.3 Å could be identified. These  
412 parameters allow calculation of a helical rotation of 84.6° and 4.26 subunits per turn. The  
413 SEGMENTCLASSRECONSTRUCT module in SPRING was again used to determine the accurate  
414 helical symmetry (Fig. S5b). The suggested output was determined to be either 4.11, 4.14,  
415 4.27 or 4.30 subunits with a helical pitch of 48.1 Å. 3D reconstruction was performed using  
416 the above parameters by iterative projection matching and back projection as implemented  
417 in the SEGMENTREFINE3D of SPRING, starting from a solid cylinder of 75 Å as a reference.  
418 Examination of the Fourier transforms simulated from the reconstructed volume to that  
419 experimentally calculated from fibres indicated that 3.89 subunits in a pitch of 36.3 Å  
420 (accounting for a helical rise of 9.33 Å and a helical rotation of 92.5 degrees) is correct for the  
421 wide filaments, and 4.27 subunits in a pitch of 48.1 Å (accounting for a helical rise of 11.26 Å  
422 and a helical rotation of 84.3 degrees) is correct for the narrow filaments (Fig. S5c, d). For the  
423 final maps 300 Å segments with a step size of three times the helical rise from 400 images  
424 were extracted. Doubling the number of used images did not further increase the final  
425 resolution. The calculated final maps were determined at 3.22 Å resolution from 98,415  
426 asymmetric units for wide filaments, and 3.49 Å from 76,866 asymmetric units for narrow  
427 filaments (Fig. S5e, f) using Fourier shell correlation (0.143 cut-off). For the final maps a B-  
428 factor of -60 Å<sup>2</sup> was applied. Figures were drawn in Chimera, Coot and CCP4mg<sup>54-56</sup>.

429

### 430 **Model building**

431 Atomic models for both forms of pili were built manually *de novo* in Coot. We assumed that  
432 one of the two pili consists of the major pilin PilA4, which is 125 amino acids in length. The

433 backbone as well as all large side chain densities of Pila4 match the density map of the wider  
434 form of the pilus. While tracing the backbone into the density maps it became apparent that  
435 the subunits forming the narrower pili are ~10% smaller than the subunits of the wider pili.  
436 Following the results of mass spectrometry and deletion experiments we modelled the second  
437 most abundant protein, TT\_C1836 (111 amino acids) into the density map of thin pili. The  
438 backbone and visible side chains fit perfectly into the density map. The structure was  
439 iteratively refined by Refmac5<sup>57</sup> followed by manual rebuilding in Coot and ISOLDE<sup>58</sup>. The  
440 final models contain all amino acid residues of the mature protein. The double stranded DNA  
441 in Fig. 6 (based on PDB: 1bna) was modelled around the wide pilus using Chimera and Coot.

442

#### 443 **Data deposition**

444 The cryo-EM maps were deposited in the Electron Microscopy Data Bank with accession codes  
445 EMD-XXXX (wide pilus) and EMD-YYYY (narrow pilus). The structure coordinates of the atomic  
446 models of the wide and the narrow pilus were deposited in the Protein Data Bank with  
447 accession numbers WWWW and ZZZZ, respectively.

448

#### 449 **Sequence Alignment**

450 Sequence alignment was performed using the PRALINE server<sup>59</sup> with the default settings  
451 (weight matrix: BLOSSUM62, gap opening penalty: 12, gap extension penalty: 1).

452

#### 453 **Mass spectrometry**

454 Purified pilus preparations were processed using a modified FASP workflow<sup>60</sup> as described  
455 previously<sup>61</sup>. In brief, reduced and alkylated protein extracts were digested sequentially with  
456 Lys-C and trypsin on Microcon-10 filters (Merck Millipore, # MRCPRT010 Ultracel YM-10).  
457 Digested samples were desalted using ZipTips according to the manufacturer's instructions,  
458 dried in a Speed-Vac and stored at -20 °C until LC/MS-MS analysis. Dried peptides were  
459 dissolved in 5 % acetonitrile with 0.1 % formic acid, and subsequently loaded using a nano-  
460 HPLC (Dionex U3000 RSLCnano) on reverse-phase columns (trapping column: particle size  
461 3µm, C18, L=20mm; analytical column: particle size <2µm, C18, L=50cm; PepMap,  
462 Dionex/Thermo Fisher). Peptides were eluted in gradients of water (buffer A: water with 5 %  
463 v/v acetonitrile and 0.1 % formic acid) and acetonitrile (buffer B: 20 % v/v water and 80 % v/v  
464 acetonitrile and 0.1 % formic acid). All LC-MS-grade solvents were purchased from Fluka.  
465 Gradients were ramped from 4 % to 48 % B in 120 minutes at flow rates of 300 nl/min.  
466 Peptides eluting from the column were ionised online using a Thermo nanoFlex ESI-source  
467 and analysed in a Thermo "Q Exactive Plus" mass spectrometer. Mass spectra were acquired  
468 over the mass range 350-1400m/z (Q Exactive Plus) and sequence information was acquired

469 by computer-controlled, data-dependent automated switching to MS/MS mode using  
470 collision energies based on mass and charge state of the candidate ions.

471

472 Raw MS data were processed and analysed with MaxQuant<sup>62</sup>. In brief, spectra were matched  
473 to the full 15 nalyse.org database (reviewed and non-reviewed, downloaded on the  
474 13/05/2016) and a contaminant and decoy database. Precursor mass tolerance was set to 4.5  
475 ppm, fragment ion tolerance to 20 ppm, with fixed modification of Cys residues  
476 (carboxyamidomethylation +57.021) and variable modifications of Met residues (Ox +15.995),  
477 Lys residues (Acetyl +42.011), Asn and Gln residues (Deamidation +0.984) and of N-termini  
478 (carbamylation +43.006). Peptide identifications were calculated with FDR = 0.01, and  
479 proteins with one peptide per protein included for subsequent analyses. Proteomics data  
480 associated with this manuscript have been uploaded to PRIDE<sup>63</sup>. Anonymous reviewer access  
481 is available upon request. Peptide intensities (label free quantitation) were analysed using  
482 MaxQuant and Perseus<sup>62</sup>. Differential abundance of proteins (detected in at least 3 of 4  
483 replicates in each condition) was analysed using a two-sided t test with a FDR of 0.01 and  $s_0$   
484 = 0.05.

485

486 For gel-based MS, purified pili were separated by SDS-PAGE (Mini Protean TGX 4-15 %, Biorad,  
487 Hercules, USA) and proteins were stained using Bio-Safe Coomassie Stain (Biorad, Hercules,  
488 USA). Bands were cut out and analysed by MS at the University of Bristol Proteomics Facility.

489

#### 490 **Twitching motility**

491 *T. thermophilus* HB27 strains were grown at 68 °C for 3 days and at 58 °C for 7 days under  
492 humid conditions on minimal medium agar plates<sup>10</sup> containing 0.1 % bovine serum albumin.  
493 Plates were then stained with Coomassie blue and cells washed off to reveal twitching zones.  
494 The contrast has been inverted in the images.

495

#### 496 **Natural transformation**

497 *T. thermophilus* wild-type, *pilA4::km* and *TT\_C1836::km* mutants were cultured in TM<sup>+</sup> media  
498 containing appropriate antibiotics for 24h at 68 °C, 150 rpm (New Brunswick Innova 42,  
499 Eppendorf, Hamburg, Germany). These cultures were used to inoculate 10 ml TM<sup>+</sup> media (with  
500 appropriate antibiotics) to a starting OD600 = 0.2 and incubated until OD600 = 0.5 was  
501 reached. 30 µl of the cultures were transferred into 370 µl prewarmed TM<sup>+</sup> medium, and 10  
502 µg genomic DNA from a spontaneous streptomycin-resistant HB27 mutant was added (HB27  
503 Strep). The cultures were incubated for 30 min at 68 °C, 150 rpm. These were subsequently

504 diluted (400  $\mu$ l in 3 ml TM<sup>+</sup>) and incubated for an additional 3 h at 68 °C, 150rpm.  
505 Transformations were plated in suitable dilutions onto TM<sup>+</sup> agar plates containing 100  $\mu$ g/ml  
506 streptomycin to determine the number of transformants. The number of viable cells was  
507 determined by plating on TM<sup>+</sup> agar plates lacking streptomycin. Following incubation for 2  
508 days at 68°C, colonies were counted. The transformation efficiency was calculated as the  
509 number of transformations per number of living cells.

510

### 511 **Acknowledgements**

512 We thank Werner Kühlbrandt and Deryck Mills for their support at the MPI of Biophysics in  
513 Frankfurt, and Carsten Sachse for indispensable assistance using SPRING and feedback on early  
514 versions of this manuscript. We thank Mathew McLaren for maintenance of the EM facility in  
515 Exeter and we acknowledge access and support of the GW4 Facility for High-Resolution  
516 Electron Cryo-Microscopy, funded by the Wellcome Trust (202904/Z/16/Z and 206181/Z/17/Z)  
517 and BBSRC (BB/R000484/1). We acknowledge Diamond for access and support of the cryoEM  
518 facilities at the UK national electron bio-imaging centre (eBIC), proposal EM18258, funded by  
519 the Wellcome Trust, MRC and BBSRC. We thank Kate Heesom (University of Bristol Proteomics  
520 Facility), Imke Wüllenweber and Fiona Rupprecht (MPI for Biophysics) for MS experiments.  
521 We acknowledge the BBSRC (BB/R008639/1), Max-Planck-Society, the University of Exeter  
522 and the Deutsche Forschungsgemeinschaft (AV 9/6-2) for funding.

523

### 524 **Author contributions**

525 Major contributions to (i) the conception or design of the study (AN, MS, RS, BD, BA, VAMG)  
526 (ii) the acquisition, analysis, or interpretation of the data (AN, MS, RS, KK, KS, JDL, BD, BA,  
527 VAMG); and (iii) writing of the manuscript (AN, MS, BD, VAMG). All authors commented on  
528 the manuscript.

529

### 530 **Conflict of interest**

531 The authors declare no conflict of interest.



532 **References**

- 533 1. Hobbs, M. & Mattick, J. S. Common components in the assembly of type 4 fimbriae,  
534 DNA transfer systems, filamentous phage and protein-secretion apparatus: a general  
535 system for the formation of surface-associated protein complexes. *Mol. Microbiol.*  
536 (1993). doi:10.1111/j.1365-2958.1993.tb01949.x
- 537 2. Kaiser, D. Bacterial motility: How do pili pull? *Current Biology* (2000).  
538 doi:10.1016/S0960-9822(00)00764-8
- 539 3. Averhoff, B. & B., A. Shuffling genes around in hot environments: The unique DNA  
540 transporter of *Thermus thermophilus*. in *FEMS microbiology reviews* **33**, 611–626  
541 (2009).
- 542 4. Strom, M. S. & Lory, S. Amino acid substitutions in pilin of *Pseudomonas aeruginosa*.  
543 Effect on leader peptide cleavage, amino-terminal methylation, and pilus assembly. *J.*  
544 *Biol. Chem.* (1991).
- 545 5. Paetzel, M., Dalbey, R. E. & Strynadka, N. C. J. Crystal structure of a bacterial signal  
546 peptidase apoenzyme. Implications for signal peptide binding and the Ser-Lys dyad  
547 mechanism. *J. Biol. Chem.* (2002). doi:10.1074/jbc.M110983200
- 548 6. Karuppiah, V., Collins, R. F., Thistlethwaite, A., Gao, Y. & Derrick, J. P. Structure and  
549 assembly of an inner membrane platform for initiation of type IV pilus biogenesis.  
550 *Proc. Natl. Acad. Sci. U. S. A.* **110**, E4638-47 (2013).
- 551 7. Kruse, K., Salzer, R. & Averhoff, B. The traffic ATPase PilF interacts with the inner  
552 membrane platform of the DNA translocator and type IV pili from  
553 *Thermus thermophilus*. *FEBS Open Bio* (2019). doi:10.1002/2211-5463.12548
- 554 8. Rose, I. *et al.* Identification and characterization of a unique, zinc-containing  
555 transport ATPase essential for natural transformation in *Thermus thermophilus*  
556 HB27. *Extremophiles* (2011). doi:10.1007/s00792-010-0343-2
- 557 9. Salzer, R., Joos, F. & Averhoff, B. Type IV pilus biogenesis, twitching motility, and DNA  
558 uptake in *Thermus thermophilus*: Discrete roles of antagonistic ATPases PilF, PilT1,  
559 and PilT2. *Appl. Environ. Microbiol.* **80**, 644–652 (2014).
- 560 10. Burkhardt, J., Vonck, J., Langer, J. D., Salzer, R. & Averhoff, B. Unusual N-terminal  
561  $\alpha\beta\alpha\beta\beta\alpha$  fold of PilQ from *Thermus thermophilus* mediates ring formation and is  
562 essential for piliation. *J. Biol. Chem.* **287**, 8484–8494 (2012).
- 563 11. Gold, V. A. M., Salzer, R., Averhoff, B. & Kühlbrandt, W. Structure of a type IV pilus  
564 machinery in the open and closed state. *Elife* **4**, (2015).
- 565 12. Salzer, R. *et al.* Topology and structure/function correlation of ring-and gate-forming  
566 domains in the dynamic secretin complex of *Thermus thermophilus*. *J. Biol. Chem.*  
567 **291**, (2016).

- 568 13. D'Imprima, E. *et al.* Cryo-EM structure of the bifunctional secretin complex of  
569 *Thermus thermophilus*. *Elife* (2017). doi:10.7554/elife.30483
- 570 14. Salzer, R., Kern, T., Joos, F. & Averhoff, B. Environmental factors affecting the  
571 expression of type IV pilus genes as well as piliation of *Thermus thermophilus*. *FEMS*  
572 *Microbiol. Lett.* (2014). doi:10.1111/1574-6968.12506
- 573 15. Chang, Y.-W. W. *et al.* Architecture of the type IVa pilus machine. *Science* (80-. ). **351**,  
574 aad2001 (2016).
- 575 16. Parge, H. E. *et al.* Structure of the fibre-forming protein pilin at 2.6 Å resolution.  
576 *Nature* (1995). doi:10.1038/378032a0
- 577 17. Craig, L. *et al.* Type IV Pilus Structure by Cryo-Electron Microscopy and  
578 Crystallography: Implications for Pilus Assembly and Functions. *Mol. Cell* **23**, 651–662  
579 (2006).
- 580 18. Fukakusa, S. *et al.* Structure of the CFA/III major pilin subunit CofA from human  
581 enterotoxigenic *Escherichia coli* determined at 0.90 Å resolution by sulfur-SAD  
582 phasing. *Acta Crystallogr. Sect. D Biol. Crystallogr.* (2012).  
583 doi:10.1107/S0907444912034464
- 584 19. Kolappan, S., Roos, J., Yuen, A. S. W., Pierce, O. M. & Craig, L. Structural  
585 characterization of CFA/III and longus type IVb Pili from enterotoxigenic *Escherichia*  
586 *coli*. *J. Bacteriol.* (2012). doi:10.1128/JB.00282-12
- 587 20. Gorgel, M. *et al.* High-resolution structure of a type IV pilin from the metal-reducing  
588 bacterium *Shewanella oneidensis*. *BMC Struct. Biol.* (2015). doi:10.1186/s12900-015-  
589 0031-7
- 590 21. Piepenbrink, K. H. *et al.* Structural diversity in the type IV Pili of multidrug-resistant  
591 acinetobacter. *J. Biol. Chem.* (2016). doi:10.1074/jbc.M116.751099
- 592 22. Karuppiah, V., Thistlethwaite, A. & Derrick, J. P. Structures of type IV pilins from  
593 *Thermus thermophilus* demonstrate similarities with type II secretion system  
594 pseudopilins. *J. Struct. Biol.* (2016). doi:10.1016/j.jsb.2016.08.006
- 595 23. Kolappan, S. *et al.* Structure of the neisseria meningitidis type IV pilus. *Nat. Commun.*  
596 1–12 (2016). doi:10.1038/ncomms13015
- 597 24. Wang, F. *et al.* Cryoelectron Microscopy Reconstructions of the *Pseudomonas*  
598 *aeruginosa* and *Neisseria gonorrhoeae* Type IV Pili at Sub-nanometer Resolution.  
599 *Structure* **25**, 1423-1435.e4 (2017).
- 600 25. Bardiaux, B. *et al.* Structure and Assembly of the Enterohemorrhagic *Escherichia coli*  
601 Type 4 Pilus. *Structure* (2019). doi:10.1016/j.str.2019.03.021
- 602 26. Schwarzenlander, C., Haase, W. & Averhoff, B. The role of single subunits of the DNA  
603 transport machinery of *Thermus thermophilus* HB27 in DNA binding and transport.

- 604 *Environ. Microbiol.* **11**, 801–808 (2009).
- 605 27. Friedrich, A., Prust, C., Hartsch, T., Henne, A. & Averhoff, B. Molecular analyses of the  
606 natural transformation machinery and identification of pilus structures in the  
607 extremely thermophilic bacterium *Thermus thermophilus* strain HB27. *Appl. Environ.*  
608 *Microbiol.* **68**, 745–755 (2002).
- 609 28. Fromm, S. A. & Sachse, C. Cryo-EM Structure Determination Using Segmented Helical  
610 Image Reconstruction. in *Methods in Enzymology* (2016).  
611 doi:10.1016/bs.mie.2016.05.034
- 612 29. Daum, B. *et al.* Structure and in situ organisation of the *pyrococcus furiosus*  
613 archaeellum machinery. *Elife* **6**, (2017).
- 614 30. Craig, L. & Li, J. Type IV pili: paradoxes in form and function. *Current Opinion in*  
615 *Structural Biology* **18**, 267–277 (2008).
- 616 31. Biais, N., Higashi, D. L., Brujic, J., So, M. & Sheetz, M. P. Force-dependent  
617 polymorphism in type IV pili reveals hidden epitopes. *Proc. Natl. Acad. Sci. U. S. A.*  
618 **107**, 11358–63 (2010).
- 619 32. Aas, F. E. *et al.* Substitutions in the N-terminal alpha helical spine of *Neisseria*  
620 *gonorrhoeae* pilin affect Type IV pilus assembly, dynamics and associated functions.  
621 *Mol. Microbiol.* (2007). doi:10.1111/j.1365-2958.2006.05482.x
- 622 33. Li, J., Egelman, E. H. & Craig, L. Structure of the *Vibrio cholerae* Type IVb pilus and  
623 stability comparison with the *Neisseria gonorrhoeae* Type IVa pilus. *J. Mol. Biol.* **418**,  
624 47–64 (2012).
- 625 34. Campos, M., Nilges, M., Cisneros, D. A. & Francetic, O. Detailed structural and  
626 assembly model of the type II secretion pilus from sparse data. *Proc. Natl. Acad. Sci.*  
627 (2010). doi:10.1073/pnas.1001703107
- 628 35. Poweleit, N. *et al.* CryoEM structure of the *Methanospirillum hungatei* archaeellum  
629 reveals structural features distinct from the bacterial flagellum and type IV pili. *Nat.*  
630 *Microbiol.* **2**, 16222 (2016).
- 631 36. Meshcheryakov, V. A. *et al.* High-resolution archaeellum structure reveals a conserved  
632 metal-binding site. *EMBO Rep.* (2019). doi:10.15252/embr.201846340
- 633 37. Rumszauer, J., Schwarzenlander, C. & Averhoff, B. Identification, subcellular  
634 localization and functional interactions of PilMNOWQ and PilA4 involved in  
635 transformation competency and pilus biogenesis in the thermophilic bacterium  
636 *Thermus thermophilus* HB27. *FEBS J.* **273**, 3261–3272 (2006).
- 637 38. Marceau, M., Forest, K., Béretti, J. L., Tainer, J. & Nassif, X. Consequences of the loss  
638 of O-linked glycosylation of meningococcal type IV pilin on piliation and pilus-  
639 mediated adhesion. *Mol. Microbiol.* (1998). doi:10.1046/j.1365-2958.1998.00706.x

- 640 39. Daum, B. & Gold, V. Twitch or swim: towards the understanding of prokaryotic  
641 motion based on the type IV pilus blueprint. *Biol. Chem.* (2018). doi:10.1515/hsz-  
642 2018-0157
- 643 40. Friedrich, A., Rumszauer, J., Henne, A. & Averhoff, B. Pilin-like proteins in the  
644 extremely thermophilic bacterium *Thermus thermophilus* HB27: Implication in  
645 competence for natural transformation and links to type IV pilus biogenesis. *Appl.*  
646 *Environ. Microbiol.* **69**, 3695–3700 (2003).
- 647 41. Cisneros, D. A., Bond, P. J., Pugsley, A. P., Campos, M. & Francetic, O. Minor  
648 pseudopilin self-assembly primes type II secretion pseudopilus elongation. *EMBO J.*  
649 (2012). doi:10.1038/emboj.2011.454
- 650 42. Van Schaik, E. J. *et al.* DNA binding: A novel function of *Pseudomonas aeruginosa* type  
651 IV pili. *J. Bacteriol.* (2005). doi:10.1128/JB.187.4.1455-1464.2005
- 652 43. Hamilton, H. L. & Dillard, J. P. Natural transformation of *Neisseria gonorrhoeae*: From  
653 DNA donation to homologous recombination. *Molecular Microbiology* (2006).  
654 doi:10.1111/j.1365-2958.2005.04964.x
- 655 44. Kruse, K., Salzer, R., Joos, F. & Averhoff, B. Functional dissection of the three N-  
656 terminal general secretory pathway domains and the Walker motifs of the traffic  
657 ATPase PilF from *Thermus thermophilus*. *Extremophiles* (2018). doi:10.1007/s00792-  
658 018-1008-9
- 659 45. Oshima, T. & Imahori, K. Description of *Thermus thermophilus* (Yoshida and Oshima)  
660 comb. nov., a Nonsporulating Thermophilic Bacterium from a Japanese Thermal Spa.  
661 *Int. J. Syst. Bacteriol.* (1974). doi:10.1099/00207713-24-1-102
- 662 46. Kremer, J. R., Mastronarde, D. N. & McIntosh, J. R. Computer visualization of three-  
663 dimensional image data using IMOD. *J. Struct. Biol.* (1996).  
664 doi:10.1006/jsbi.1996.0013
- 665 47. Frangakis, A. S. & Hegerl, R. Noise reduction in electron tomographic reconstructions  
666 using nonlinear anisotropic diffusion. *J. Struct. Biol.* (2001).  
667 doi:10.1006/jsbi.2001.4406
- 668 48. Schneider, C. A., Rasband, W. S. & Eliceiri, K. W. NIH Image to ImageJ: 25 years of  
669 image analysis. *Nat. Methods* (2012).
- 670 49. Tang, G. *et al.* EMAN2: an extensible image processing suite for electron microscopy.  
671 *J. Struct. Biol.* (2007). doi:10.1016/j.jsb.2006.05.009
- 672 50. Scheres, S. H. W. RELION: Implementation of a Bayesian approach to cryo-EM  
673 structure determination. *J. Struct. Biol.* (2012). doi:10.1016/j.jsb.2012.09.006
- 674 51. Grant, T. & Grigorieff, N. Measuring the optimal exposure for single particle cryo-EM  
675 using a 2.6 Å reconstruction of rotavirus VP6. *Elife* (2015). doi:10.7554/elife.06980

- 676 52. Desfosses, A., Ciuffa, R., Gutsche, I. & Sachse, C. SPRING - An image processing  
677 package for single-particle based helical reconstruction from electron  
678 cryomicrographs. *J. Struct. Biol.* (2014). doi:10.1016/j.jsb.2013.11.003
- 679 53. Mindell, J. A. & Grigorieff, N. Accurate determination of local defocus and specimen  
680 tilt in electron microscopy. *J. Struct. Biol.* (2003). doi:10.1016/S1047-8477(03)00069-  
681 8
- 682 54. Pettersen, E. F. *et al.* UCSF Chimera--a visualization system for exploratory research  
683 and analysis. *J. Comput. Chem.* (2004). doi:10.1002/jcc.20084
- 684 55. Emsley, P. & Cowtan, K. Coot: Model-building tools for molecular graphics. *Acta*  
685 *Crystallogr. Sect. D Biol. Crystallogr.* (2004). doi:10.1107/S0907444904019158
- 686 56. McNicholas, S., Potterton, E., Wilson, K. S. & Noble, M. E. M. Presenting your  
687 structures: The CCP4mg molecular-graphics software. *Acta Crystallogr. Sect. D Biol.*  
688 *Crystallogr.* (2011). doi:10.1107/S0907444911007281
- 689 57. Brown, A. *et al.* Tools for macromolecular model building and refinement into  
690 electron cryo-microscopy reconstructions. *Acta Crystallogr. Sect. D Biol. Crystallogr.*  
691 (2015). doi:10.1107/S1399004714021683
- 692 58. Croll, T. I. ISOLDE : a physically realistic environment for model building into low-  
693 resolution electron-density maps . *Acta Crystallogr. Sect. D Struct. Biol.* (2018).  
694 doi:10.1107/s2059798318002425
- 695 59. Heringa, J. Two strategies for sequence comparison: Profile-preprocessed and  
696 secondary structure-induced multiple alignment. *Comput. Chem.* (1999).  
697 doi:10.1016/S0097-8485(99)00012-1
- 698 60. Wiśniewski, J. R., Zougman, A., Nagaraj, N. & Mann, M. Universal sample preparation  
699 method for proteome analysis. *Nat. Methods* (2009). doi:10.1038/nmeth.1322
- 700 61. Schanzenbächer, C. T., Sambandan, S., Langer, J. D. & Schuman, E. M. Nascent  
701 Proteome Remodeling following Homeostatic Scaling at Hippocampal Synapses.  
702 *Neuron* (2016). doi:10.1016/j.neuron.2016.09.058
- 703 62. Tyanova, S., Temu, T. & Cox, J. The MaxQuant computational platform for mass  
704 spectrometry-based shotgun proteomics. *Nat. Protoc.* (2016).  
705 doi:10.1038/nprot.2016.136
- 706 63. Vizcaíno, J. A. *et al.* 2016 update of the PRIDE database and its related tools. *Nucleic*  
707 *Acids Res.* (2016). doi:10.1093/nar/gkv1145
- 708

709 Figures

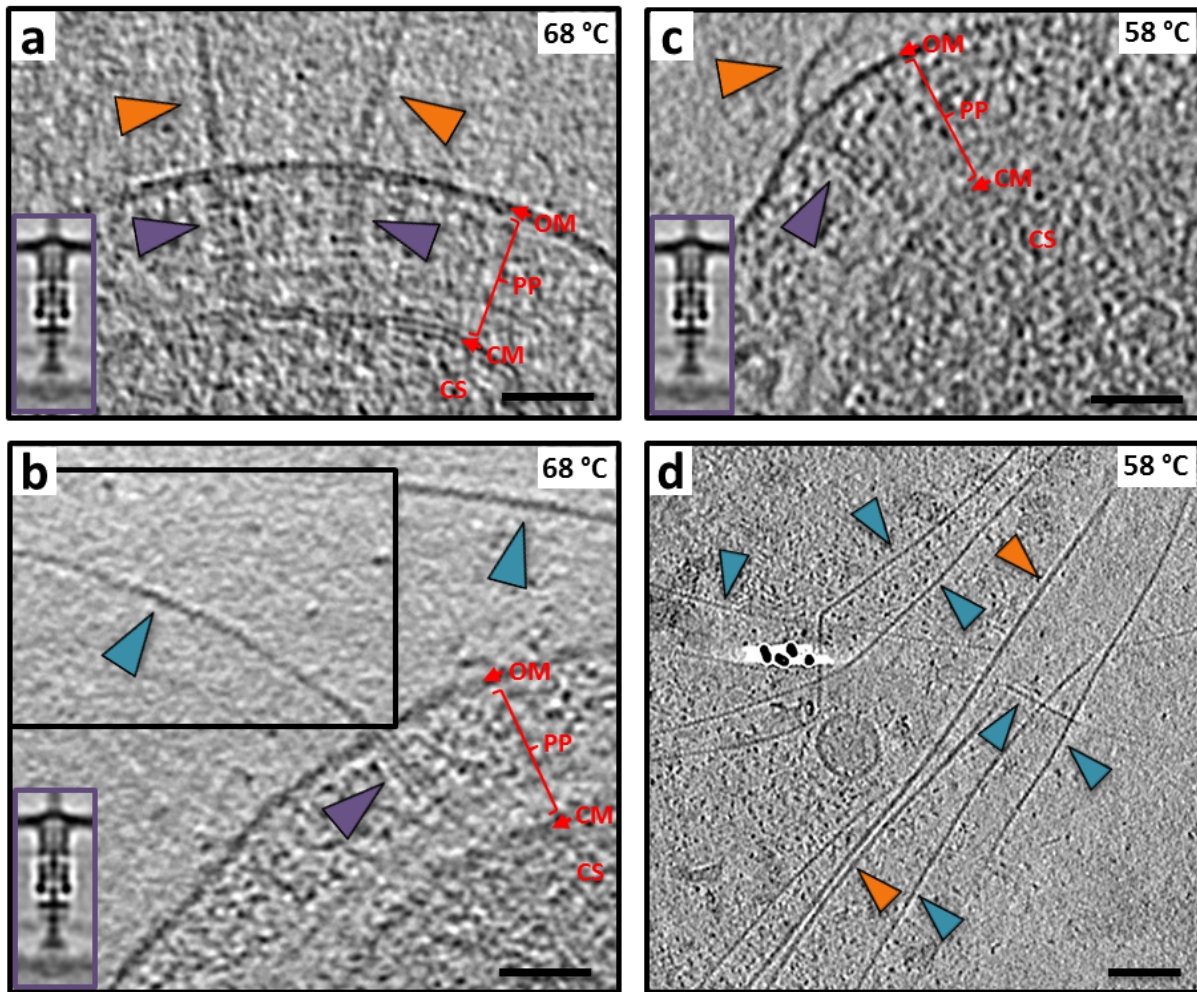

710

711 **Fig. 1: The T4P machinery assembles two types of pilus**

712 **a, b**, Tomographic slices through *T. thermophilus* cells grown at 68 °C show both wide (orange  
713 arrowheads) and narrow (teal arrowheads) pili emerging from the T4P machinery (purple  
714 arrowheads). The pilus emerges from the cell at an acute angle in (**b**), thus the tomographic  
715 volume has been rotated to align with the T4P machinery for visualisation (upper inset box).

716 **c**, Tomographic slice through a *T. thermophilus* cell grown at 58 °C shows a wide pilus (orange  
717 arrowhead) emerging from the T4P machinery (purple arrowhead).

718 **d**, Tomographic slice of an area containing many pili from a cell preparation grown at 58 °C.  
719 Both wide (orange arrowheads) and narrow pili (teal arrowheads) are visible. Purple insets in  
720 **a-c** show the subtomogram average of the T4P machinery (EMD-3023)<sup>11</sup>. OM, outer  
721 membrane; PP, periplasm; CM, cytoplasmic membrane; CS, Cytosol. Scale bars, 50 nm.

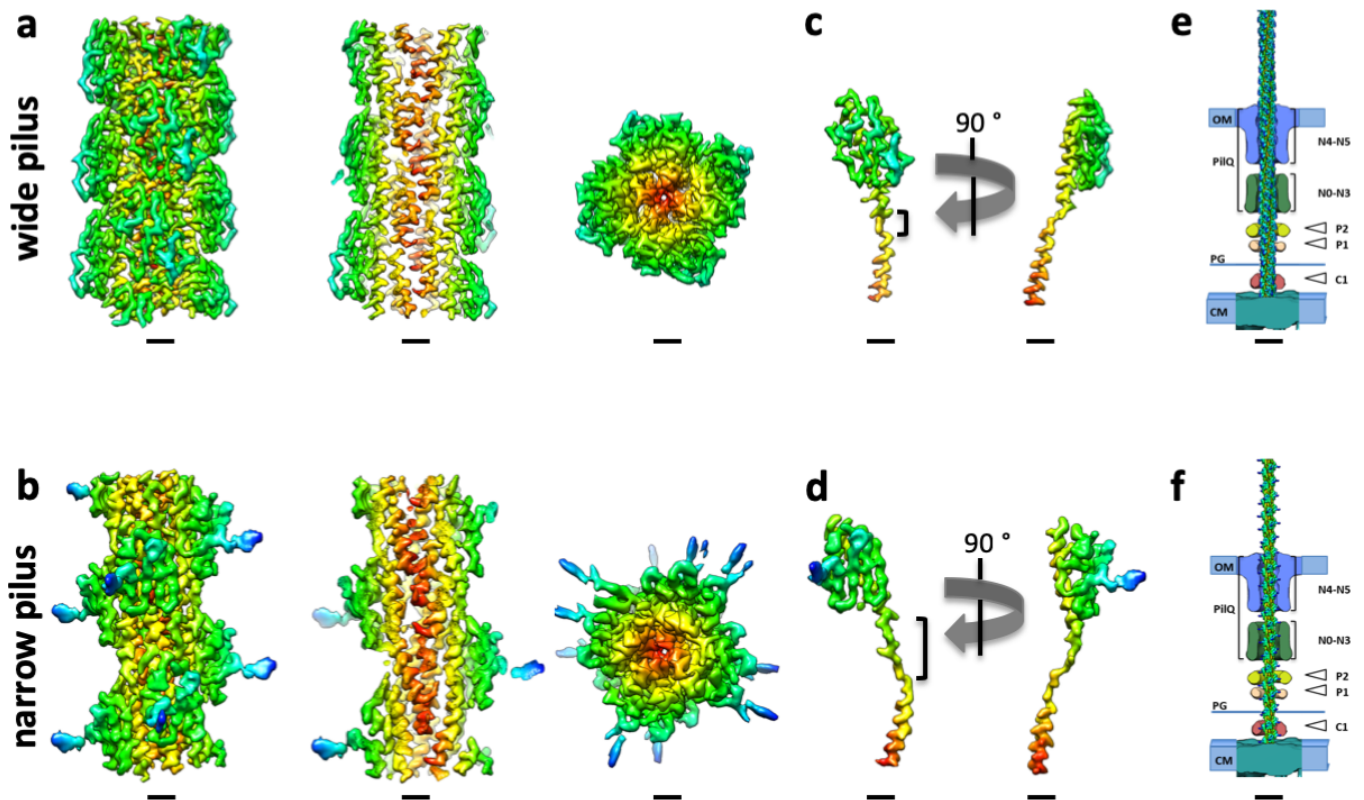

723 **Fig. 2: Helical reconstruction of *TthHB27* pili**

724 **a, b**, Side views, cross sections and top views of the density maps of the wide (a) and narrow  
725 (b) pilus fibres. Coloured by cylinder radius from red (centre) to blue (periphery). Scale bars,  
726 10 Å.

727 **c, d**, A single subunit of the wide (c) and narrow (d) pilus segmented from the maps in a and  
728 b. The brackets show the melted stretch in the N-terminal  $\alpha$ -helix. Scale bars, 10 Å.

729 **e, f**, Pilus filaments docked into the subtomogram average of the open state of the T4P  
730 machinery (EMD-3023)<sup>11</sup>. Domains of the secretin PilQ (blue and green; N0-N5), with  
731 unassigned protein densities P2 (yellow), P1 (orange) and C1 (red) are shown. OM, outer  
732 membrane; PG, peptidoglycan; CM, cytoplasmic membrane. Scale bars, 10 nm.

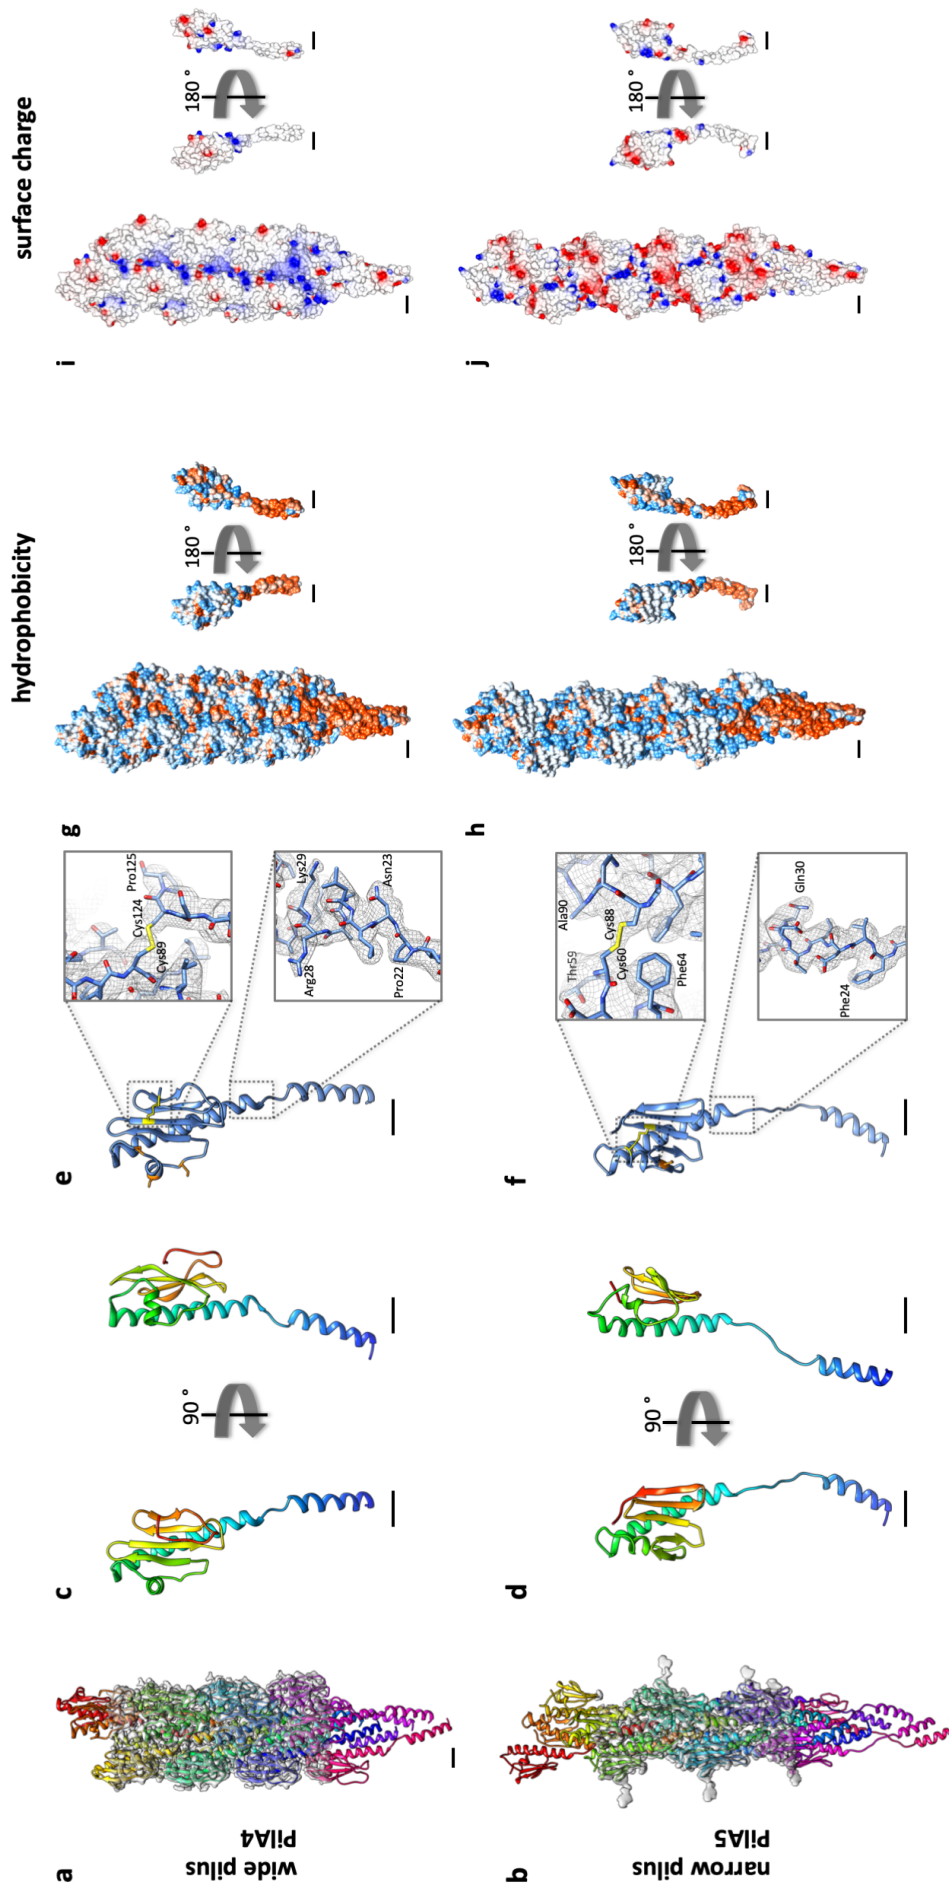

733 Fig. 3: Molecular models of wide and narrow pili



734 **a, b**, Molecular models of short sections of filaments (15 subunits each) with the  
735 corresponding EM density maps. **a**, wide pilus comprised of PilA4; **b**, narrow pilus comprised  
736 of PilA5. Scale bars, 10 Å.

737 **c, d**, Ribbon representation of a single PilA4 (**c**) and PilA5 (**d**) subunit. N-terminus blue, C-  
738 terminus red. Scale bars, 10 Å.

739 **e, f**, Ribbon representation of a single PilA4 (**e**) and PilA5 (**f**) subunit with selected sidechains  
740 shown. Yellow, disulphide bond; orange, serines with posttranslational modification. Insets  
741 show details of the molecular model within the EM density map. Top insets, disulphide bond;  
742 bottom insets, side chain densities. Scale bars, 10 Å.

743 **g, h**, Hydrophobicity of PilA4 (**g**) and PilA5 (**h**) filaments (left) and single subunits (right).  
744 Hydrophobic (red) and hydrophilic (blue) residues are shown. Scale bars, 10 Å.

745 **i, j**, Electrostatic surface charge of PilA4 (**i**) and PilA5 (**j**) filaments (left) and single subunits  
746 (right). Negative charges (red) and positive charges (blue) are shown. Scale bars, 10 Å.

747

748

749

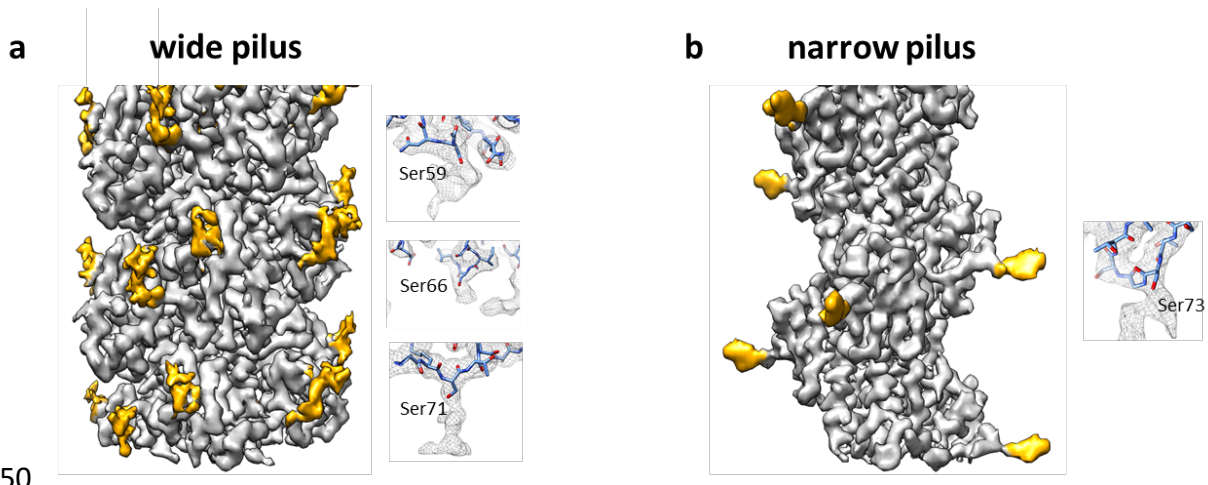

750

751 **Fig. 4: Post-translational modification**

752 **a, b**, Surface representation of the EM maps of the wide (**a**) and narrow (**b**) pilus showing the  
753 protein model (grey) and densities that protrude into the solvent and could not be attributed  
754 to the polypeptide backbone or an amino acid side chain. These are most likely glycans  
755 (yellow). Insets show close-ups of large unassigned densities near serine residues. Scale bars,  
756 10 Å.

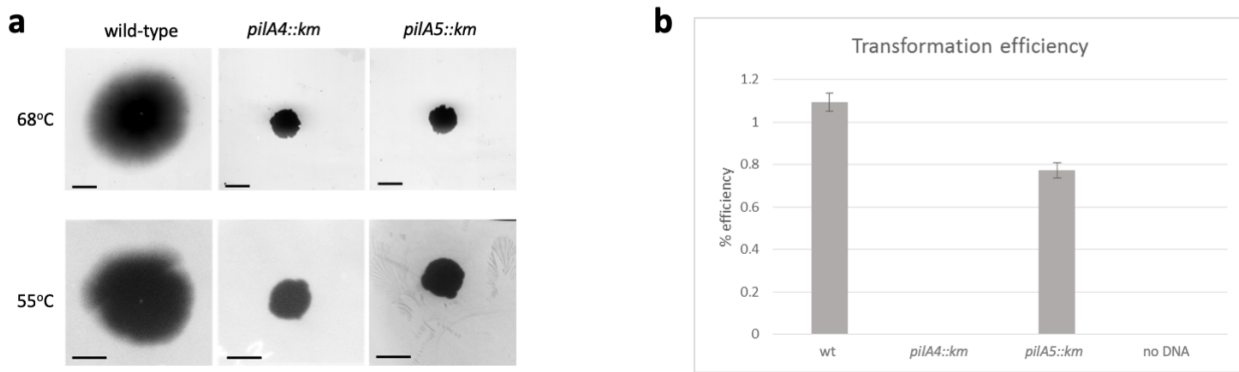

758 **Fig. 5: Functional characterisation of *T. thermophilus* mutants**

759 **a**, Twitching motility of *T. thermophilus* HB27 strains. Only wild-type cells show twitching.

760 Scale bars = 0.5 cm.

761 **b**, Natural transformation efficiency of *T. thermophilus* HB27 strains.

762

763

764

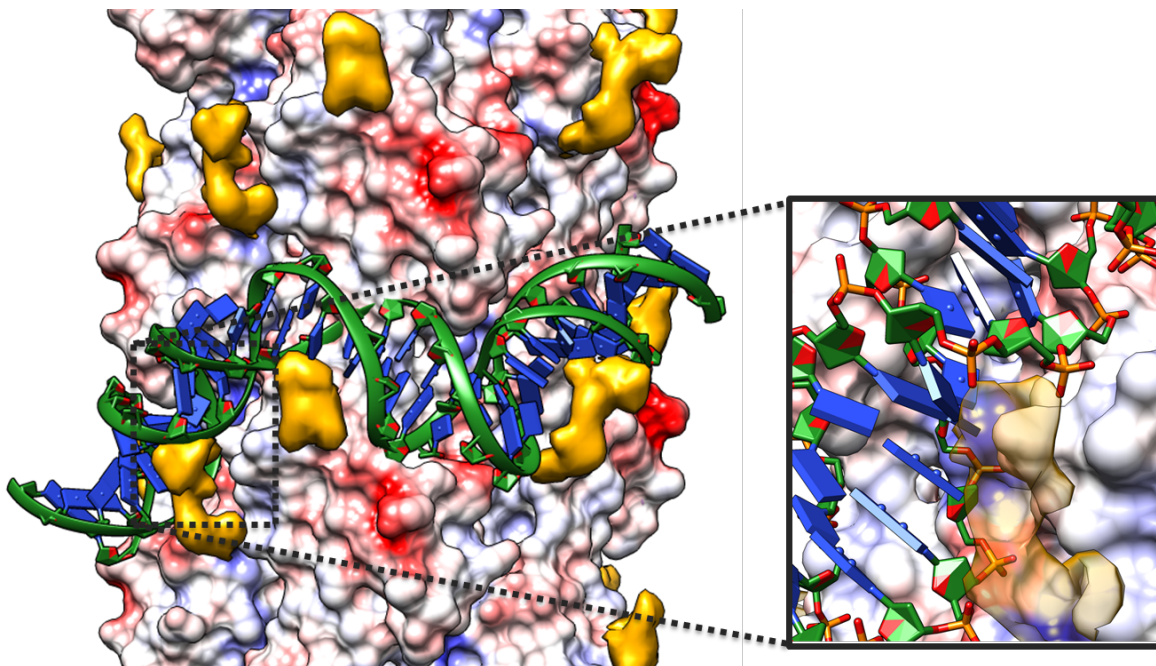

765

766 **Fig. 6: Proposed DNA binding to wide pili**

767 A double stranded DNA molecule (green) is modelled around a wide pilus shown in surface

768 charge representation (negative charges, red; positive charges, blue). The DNA backbone fits

769 neatly into the positively charged groove of the PilA4 filament (inset). Post-translational

770 modifications are shown in yellow (transparent yellow in inset). Scale bar, 10 Å.
